# Supplementary material
Source: PubMed Central journal article supplement (PMC4246311)
Supplement: pnas.201314814SI.pdf [file pnas.201314814SI.pdf]

# Supporting Information

Heller et al. 10.1073/pnas.1314814111

## SI Text

### S1. Proof of Theorem 1

The procedure that declares all features with  $r$  values  $\leq q$  is equivalent to the procedure in *Variations* in the main text, where the choice of emphasis between the studies is discussed, as proved in *Lemma S1.1*. We show that our proposal, in its most general form [i.e., with  $c_2 \in (0, 1)$ ], controls the FDR at a level at most

$$f_{00}c_1(q)c_2q^2 + f_{01}c_1(q)q + E\left(\frac{|I_{10} \cap \mathcal{R}_1|}{\max(|\mathcal{R}_1|, 1)}\right)c_2q \quad [\text{S1}]$$

under the conditions of *Theorem 1*, where  $f_{0j} = |I_{0j}|/m, j \in \{0, 1\}$ , and  $f_{10} = |I_{10}|/m$ .

Before proving the above upper bound on the FDR, we show that if the above upper bound holds and  $l_{00} \leq f_{00}$ , *Theorem 1* follows. Note that if the constants  $(l_{00}, c_2)$  satisfy the inequality

$$f_{00}c_1(q)c_2q + f_{01}c_1(q) + c_2 \leq 1,$$

then the FDR for replicability analysis is controlled at level at most  $q$ . This inequality holds for any choice of  $(l_{00}, c_2)$  that satisfies the relationship

$$l_{00} \leq \frac{1 - f_{01} - f_{00}c_2q}{1 - c_2q}.$$

Unfortunately,  $f_{00}$  and  $f_{01}$  are not known. If the guess for  $l_{00}$  is indeed conservative, i.e.,  $l_{00} \leq f_{00}$ , then the above inequality holds because  $f_{00} \leq 1 - f_{01}$ . Thus, for any value  $l_{00} \leq f_{00}$  and  $c_2 \in (0, 1)$ , the FDR for replicability analysis is controlled at level at most  $q$ .

**Proof for the Upper Bound in [S1].** Let  $R_j$  be the indicator of whether feature  $j$  was declared replicated for  $j = 1, \dots, m$ , and  $R = \sum_{j=1}^m R_j$ . The FDR for replicability analysis is

$$\begin{aligned} \text{FDR} = & E\left(\sum_{j \in I_{00}} \frac{R_j}{\max(R, 1)}\right) + E\left(\sum_{j \in I_{01}} \frac{R_j}{\max(R, 1)}\right) \\ & + E\left(\sum_{j \in I_{10}} \frac{R_j}{\max(R, 1)}\right). \end{aligned} \quad [\text{S2}]$$

For items *i-iii* in *Theorem 1*, we find an upper bound for each of the three expectations in [S2]; specifically we show the following inequalities [S3]–[S5]:

$$E\left(\sum_{j \in I_{00}} \frac{R_j}{\max(R, 1)}\right) \leq |I_{01}| \frac{c_1(q)q}{m} = f_{01}c_1(q)q, \quad [\text{S3}]$$

$$E\left(\sum_{j \in I_{10}} \frac{R_j}{\max(R, 1)}\right) \leq E\left(\frac{|I_{10} \cap \mathcal{R}_1|}{\max(|\mathcal{R}_1|, 1)}\right)c_2q, \quad [\text{S4}]$$

$$E\left(\sum_{j \in I_{00}} \frac{R_j}{\max(R, 1)}\right) \leq f_{00}c_1(q)c_2q^2. \quad [\text{S5}]$$

Obviously the upper bounds in [S3]–[S5] and the equality in [S2] complete the proof for the upper bound in [S1]. The upper bounds in [S3] and [S4] follow directly from ref. 1. The key difference from ref. 1 is the fact that we consider a tighter upper bound for  $E(\sum_{j \in I_{00}} R_j / \max(R, 1))$  given in [S5]. We proceed to prove inequality [S5] for items *i-iii* in *Theorem 1*.

In all the derivations we refer to from ref. 1, we replace  $q_1$  in ref. 1 with  $c_1q, q - q_1$  in ref. 1 with  $c_2q$ , and  $|I_0|$  in ref. 1 with  $|I_{01}|$ , unless stated otherwise. We start with the proof of item *i* of *Theorem 1* for the case where the  $P$  values within the follow-up study are jointly independent. Inequality [S3] follows from the derivations leading to [A.3] in ref. 1. Inequality [S4] follows from the derivations leading to [A.7] in ref. 1, and by taking the expectation of the expression in [A.7] over the primary study  $P$  values. We now prove inequality [S5]. We recall the following definitions from ref. 1. Let  $P_1^{(j)}$  and  $P_2^{(j)}$  denote the vectors  $P_1 = (P_{11}, \dots, P_{1m})$  and  $P_2 = (P_{21}, \dots, P_{2m})$  with, respectively,  $P_{1j}$  and  $P_{2j}$  excluded. For  $j \in \{1, \dots, m\}$  arbitrarily fixed, let  $\mathcal{R}_1^{(j)}(P_1^{(j)}) \subseteq \{1, \dots, j-1, j+1, \dots, m\}$  be the subset of indexes selected along with index  $j$ . Note that because the selection rule is stable, this subset is fixed as long as  $P_{1j}$  is such that  $j$  is selected based on  $(P_1^{(j)}, P_{1j})$ . For any  $j \in \{1, \dots, m\}$  and given  $P_1^{(j)}$ , for  $i \in \{1, \dots, j-1, j+1, \dots, m\}$

$$e_i^{(j)} = \begin{cases} \max\left(\frac{P_{1i}}{c_1}, \frac{(|\mathcal{R}_1^{(j)}(P_1^{(j)})| + 1)P_{2i}}{mc_2}\right) & \text{if } i \in \mathcal{R}_1^{(j)}(P_1^{(j)}), \\ \infty & \text{otherwise.} \end{cases}$$

Let  $e_{(1)}^{(j)} \leq \dots \leq e_{(m-1)}^{(j)}$  be the sorted  $e_i^{(j)}$  s, and  $e_{(0)}^{(j)} = 0$ . [The  $e$  values are closely related to  $T$  values defined in appendix A of ref. 1. Specifically,  $e_i^{(j)} = T_{iq}/m$  for  $j \in \{1, \dots, m\}$  and  $i \in \{1, \dots, j-1, j+1, \dots, m\}$ .] For  $r = 1, \dots, m$ , we define  $C_r^{(j)}$  as the event in which if  $j \in I_{00} \cup I_{01} \cup I_{10}$  is declared replicated,  $r$  hypotheses are declared replicated including  $j$ , which amounts to

$$\begin{aligned} C_r^{(j)} = & \left\{ (P_1^{(j)}, P_2^{(j)}) : e_{(r-1)}^{(j)} \leq \frac{rq}{m}, e_r^{(j)} > \frac{(r+1)q}{m}, e_{(r+1)}^{(j)} \right. \\ & \left. > \frac{(r+2)q}{m}, \dots, e_{(m-1)}^{(j)} > q \right\}. \end{aligned}$$

Note that given  $P_1$ , for  $r > |\mathcal{R}_1|$ ,  $C_r^{(j)} = \emptyset$ , because exactly  $|\mathcal{R}_1| - 1$   $e_i^{(j)}$  s are finite. Obviously,  $C_r^{(j)}$  and  $C_{r'}^{(j)}$  are disjoint events for any  $r \neq r'$ , and  $\cup_{r=1}^m C_r^{(j)}$  is the entire space of  $(P_1^{(j)}, P_2^{(j)})$ . Therefore,  $\sum_{r=1}^m \Pr(C_r^{(j)}) = 1$ .

Note that from the equivalent procedure in *Variations* in the main text, the following equality follows,

$$\begin{aligned} E\left(\sum_{j \in I_{00}} \frac{R_j}{\max(R, 1)}\right) &= \sum_{j \in I_{00}} \sum_{r=1}^m \frac{1}{r} \Pr\left(j \in \mathcal{R}_1, P_{1j} \leq \frac{rc_1(q)q}{m}, P_{2j} \leq \frac{rc_2q}{\max(|\mathcal{R}_1|, 1)}, C_r^{(j)}\right) \\ &\leq \sum_{j \in I_{00}} \sum_{r=1}^m \frac{1}{r} \Pr\left(P_{1j} \leq \frac{rc_1(q)q}{m}, P_{2j} \leq c_2q, C_r^{(j)}\right) \end{aligned} \quad [\text{S6}]$$

$$\leq c_2q \frac{c_1(q)q}{m} \sum_{j \in I_{00}} \sum_{r=1}^m \Pr(C_r^{(j)}) = |I_{00}|c_2q \frac{c_1(q)q}{m} = f_{00}c_1(q)c_2q^2, \quad [\text{S7}]$$

where the inequality in [S6] follows from the fact that for any given realization of  $|\mathcal{R}_1|$  and value of  $r$  such that  $r > |\mathcal{R}_1|$ ,

$C_r^{(j)} = \emptyset$ , the inequality in [S7] follows from the independence of the  $P$  values and the fact that  $P_{1j}$  and  $P_{2j}$  are null-hypothesis  $P$  values, and the first equality in [S7] follows from the fact that  $\sum_{r=1}^m \Pr(C_r^{(j)}) = 1$ , thus completing the proof of item 1 for the case where the  $P$  values within the follow-up study are independent.

We now prove item  $i$  of Theorem 1 for the case where the  $P$  values within the follow-up study have property PRDS. The inequalities [S3] and [S4] for this case follow from the results in the supplementary material of ref. 1. Specifically, inequality [S3] follows from the proof of theorem S3.1 in ref. 1 and inequality [S4] follows from the proof of item 2 in lemma S2.1 in ref. 1. For  $j \in I_{00}$  and an arbitrary fixed  $p_1 = (p_{11}, \dots, p_{1m})$  such that  $|\mathcal{R}_1(p_1)| > 0$ ,

$$\begin{aligned} E\left(\frac{R_j}{\max(R, 1)} \middle| P_1 = p_1\right) &= \sum_{r=1}^{|\mathcal{R}_1(p_1)|} \frac{I\left(j \in \mathcal{R}_1(p_1), P_{1j} \leq \frac{rc_1(q)q}{m}\right)}{r} \\ &\quad \times \Pr\left(P_{2j} \leq \frac{rc_2q}{|\mathcal{R}_1(p_1)|}, C_r^{(j)} \middle| P_1 = p_1\right) \\ &\leq I\left(p_{1j} \leq \frac{|\mathcal{R}_1(p_1)|c_1(q)q}{m}, j \in \mathcal{R}_1(p_1)\right) \\ &\quad \times \sum_{r=1}^{|\mathcal{R}_1(p_1)|} \frac{1}{r} \Pr\left(P_{2j} \leq \frac{rc_2q}{|\mathcal{R}_1(p_1)|}, C_r^{(j)} \middle| P_1 = p_1\right) \\ &= I\left(p_{1j} \leq \frac{|\mathcal{R}_1(p_1)|c_1(q)q}{m}, j \in \mathcal{R}_1(p_1)\right) \\ &\quad \times \sum_{r=1}^{|\mathcal{R}_1(p_1)|} \frac{1}{r} \Pr\left(C_r^{(j)} \middle| P_{2j} \leq \frac{rc_2q}{|\mathcal{R}_1(p_1)|}, P_1 = p_1\right) \\ &\quad \times \Pr\left(P_{2j} \leq \frac{rc_2q}{|\mathcal{R}_1(p_1)|} \middle| P_1 = p_1\right) \\ &\leq \frac{c_2q}{|\mathcal{R}_1(p_1)|} I\left(p_{1j} \leq \frac{|\mathcal{R}_1(p_1)|c_1(q)q}{m}, j \in \mathcal{R}_1(p_1)\right) \\ &\quad \times \sum_{r=1}^{|\mathcal{R}_1(p_1)|} \Pr\left(C_r^{(j)} \middle| P_{2j} \leq \frac{rc_2q}{|\mathcal{R}_1(p_1)|}, P_1 = p_1\right) \end{aligned} \quad [\text{S8}]$$

$$\leq \frac{c_2q}{|\mathcal{R}_1(p_1)|} I\left(p_{1j} \leq \frac{|\mathcal{R}_1(p_1)|c_1(q)q}{m}, j \in \mathcal{R}_1(p_1)\right), \quad [\text{S9}]$$

where inequality [S8] follows from the independence of the  $P$  values across the studies and the fact that  $P_{2j}$  is a null-hypothesis  $P$  value. We now show that inequality [S9] holds. It follows from item 1 of lemma S2.1 in the supplementary material of ref. 1 that

$$\sum_{r=1}^{|\mathcal{R}_1(p_1)|} \Pr\left(C_r^{(j)} \middle| P_{2j} \leq \frac{rc_2q}{|\mathcal{R}_1(p_1)|}, P_1 = p_1\right) \leq 1$$

for any  $p_1 = (p_{11}, \dots, p_{1m})$  and  $j \in I_{10} \cap \mathcal{R}_1(p_1)$ . It is straightforward to verify that this result holds for  $j \in I_{00} \cap \mathcal{R}_1(p_1)$  as well, yielding inequality [S9]. It follows that for  $j \in I_{00}$ ,

$$E\left(\frac{R_j}{\max(R, 1)}\right) \leq c_2q E\left[\frac{I\left(P_{1j} \leq \frac{|\mathcal{R}_1(P_1)|c_1(q)q}{m}, j \in \mathcal{R}_1(P_1)\right)}{\max(|\mathcal{R}_1(P_1)|, 1)}\right]. \quad [\text{S10}]$$

Note that for  $j \in I_{00}$

$$\begin{aligned} E\left[\frac{I\left(P_{1j} \leq \frac{|\mathcal{R}_1(P_1)|c_1(q)q}{m}, j \in \mathcal{R}_1(P_1)\right)}{\max(|\mathcal{R}_1(P_1)|, 1)}\right] \\ = \sum_{r=1}^m \frac{1}{r} \Pr\left(P_{1j} \leq \frac{rc_1(q)q}{m}, j \in \mathcal{R}_1(P_1), \left|\mathcal{R}_1^{(j)}(P_1^{(j)})\right| = r - 1\right) \end{aligned} \quad [\text{S11}]$$

$$\leq \sum_{r=1}^m \frac{1}{r} \Pr\left(P_{1j} \leq \frac{rc_1(q)q}{m}, \left|\mathcal{R}_1^{(j)}(P_1^{(j)})\right| = r - 1\right) \quad [\text{S12}]$$

$$\leq \frac{c_1(q)q}{m} \sum_{r=1}^m \Pr\left(\left|\mathcal{R}_1^{(j)}(P_1^{(j)})\right| = r - 1\right) = \frac{c_1(q)q}{m}. \quad [\text{S13}]$$

The inequality in [S13] follows from the independence of the  $P$  values within the primary study and the fact that  $P_{1j}$  is a null-hypothesis  $P$  value. The equality in [S13] follows from the fact that  $\cup_{r=1}^m \{|\mathcal{R}_1^{(j)}(P_1^{(j)})| = r - 1\}$  is the entire space of  $P_1^{(j)}$ , represented as a union of disjoint events. Combining [S10] with [S13], we obtain for  $j \in I_{00}$

$$E\left(\frac{R_j}{\max(R, 1)}\right) \leq c_2q \frac{c_1(q)q}{m}. \quad [\text{S14}]$$

Summing this upper bound over all  $j \in I_{00}$ , we obtain the upper bound in [S5], thus completing the proof of item  $i$  of Theorem 1 for the case where the set of  $P$  values within the follow-up study has property PRDS.

We now prove item  $ii$  of Theorem 1. Inequalities [S3] and [S4] follow from the results in the supplementary material of ref. 1. Specifically, inequality [S3] follows from the derivations leading to [S2.8] in ref. 1 and inequality [S4] follows from the proof of item 2 and item 3 of Lemma S2.1 in ref. 1. We now prove inequality [S5]. Both for the case where the  $P$  values within the follow-up study are independent and for the case where the  $P$  values within the follow-up study have property PRDS, the derivations leading to [S10] and [S12] remain valid when  $m$  is replaced with  $m^*$  in the denominators of the fractions appearing in those derivations and in the terms defining  $C_r^{(j)}$ . Therefore

$$\begin{aligned} \sum_{j \in I_{00}} E\left[\frac{I\left(P_{1j} \leq \frac{|\mathcal{R}_1(P_1)|c_1(q)q/m^*}, j \in \mathcal{R}_1(P_1)\right)}{\max(|\mathcal{R}_1(P_1)|, 1)}\right] \\ \leq \sum_{j \in I_{00}} \sum_{r=1}^m \frac{1}{r} \Pr\left(P_{1j} \leq \frac{rc_1(q)q}{m^*}, \left|\mathcal{R}_1^{(j)}(P_1^{(j)})\right| = r - 1\right). \end{aligned} \quad [\text{S15}]$$

It follows from the derivations leading from [S2.3] to [S2.8] in the supplementary material of ref. 1, replacing  $I_0$  with  $I_{00}$ ,  $q_1$  with  $c_1(q)q$ , and the event  $C_r^{(j)}$  with the event  $|\mathcal{R}_1^{(j)}(P_1^{(j)})| = r - 1$  both in the derivations and in the definition of  $p_{j\#}$ , that

$$\sum_{j \in I_{00}} \sum_{r=1}^m \frac{1}{r} \Pr\left(P_{1j} \leq \frac{rc_1(q)q}{m^*}, \left|\mathcal{R}_1^{(j)}(P_1^{(j)})\right| = r - 1\right) \leq |I_{00}| \frac{c_1(q)q}{m}. \quad [\text{S16}]$$

Combining [S10] with  $m$  replaced by  $m^*$ , [S15], and [S16], we obtain inequality [S5], which completes the proof of item  $ii$  of Theorem 1.

We now prove item *iii* of Theorem 1. If we replace  $\tilde{q}_1$  with  $\tilde{c}_1(q)q$  and  $|I_0|$  with  $|I_{01}|$  in the derivations leading to [S2.18] in the supplementary material in ref. 1, we obtain

$$E\left(\sum_{j \in I_{01}} \frac{R_j}{\max(R, 1)}\right) \leq |I_{01}| \frac{\tilde{c}_1(q)q}{m} = f_{01} \tilde{c}_1(q)q. \quad [\text{S17}]$$

It follows from the definition of  $\tilde{c}_1(x)$  that  $\tilde{c}_1(x) \leq c_1(x)$  for all  $x \in (0, 1)$ , in particular  $\tilde{c}_1(q) \leq c_1(q)$ . Inequality [S3] follows immediately from this inequality and inequality [S17]. Inequality [S4] is obtained using the derivations from the main text and the supplementary material of ref. 1, as detailed in the proof of inequality [S4] for item *i* of Theorem 1. For this item  $q_1$  is replaced with  $\tilde{c}_1(q)q$  in those derivations, and to obtain inequality [S4] we use the fact that  $\tilde{c}_1(q) \leq c_1(q)$ . We now prove inequality [S5]. Both for the case where the  $P$  values within the follow-up study are independent and for the case where the  $P$  values within the follow-up study have property PRDS, the derivations leading to [S10] and [S11] remain valid when  $c_1(q)$  is replaced with  $\tilde{c}_1(q)$  in those derivations and in the terms defining  $C_r^{(j)}$ . Therefore

$$\sum_{j \in I_{00}} E\left(\frac{R_j}{\max(R, 1)}\right) \leq c_2 q \sum_{j \in I_{00}} \sum_{r=1}^m \frac{1}{r} \Pr\left(P_{1j} \leq \frac{\tilde{r} \tilde{c}_1(q)q}{m}, j \in \mathcal{R}_1(P_1), \left|\mathcal{R}_1^{(j)}(P_1^{(j)})\right| = r - 1\right). \quad [\text{S18}]$$

It follows from the derivations leading from [S2.9] to [S2.18] in the supplementary material of ref. 1, replacing  $I_0$  with  $I_{00}$ ,  $\tilde{q}_1$  with  $\tilde{c}_1(q)q$ , and the event  $C_r^{(j)}$  with the event  $|\mathcal{R}_1^{(j)}(P_1^{(j)})| = r - 1$  both in the derivations and in the definition of  $\tilde{p}_{jnt}$ , that

$$\sum_{j \in I_{00}} \sum_{r=1}^m \frac{1}{r} \Pr\left(P_{1j} \leq \frac{\tilde{r} \tilde{c}_1(q)q}{m}, j \in \mathcal{R}_1(P_1), \left|\mathcal{R}_1^{(j)}(P_1^{(j)})\right| = r - 1\right) \leq |I_{00}| \frac{\tilde{c}_1(q)q}{m}. \quad [\text{S19}]$$

Combining [S18] with [S19], and using the fact that  $\tilde{c}_1(q) \leq c_1(q)$ , we obtain inequality [S5], which completes the proof of item *iii* of Theorem 1.

**Lemma S1.1.** For Steps *i*–*iv* in the computation of  $r$  values:

- i*) For feature  $i \in \mathcal{R}_1$ , if a solution  $r_i \in (0, 1)$  to  $f_i(r_i) = r_i$  exists, then this solution is unique; i.e., the  $r$  value in step *iv* is well defined.
- ii*) Item *i* holds when the function  $f_i(x)$  is computed with the modification in item *ii* of Theorem 1.
- iii*) Declaring the features with  $r$  values at most  $q$  is equivalent to the procedure given in Variations, second paragraph, in the main text.
- iv*) For  $r$  values computed with the modification in item *ii* of Theorem 1, declaring the features with  $r$  values at most  $q$  is equivalent to the procedure given in Variations, where  $m$  is replaced by  $m^* = m \sum_{i=1}^m 1/i$ .
- v*) The function  $\tilde{c}_1(x)$  in item *iii* of Theorem 1 is well defined. For  $r$  values computed with the modification in item *iii* of Theorem 1, declaring the features with  $r$  values at most  $q$  is equivalent to the procedure given in Variations, where  $c_1(q)$  is replaced by  $\tilde{c}_1(q)$ .

**Proof of Lemma S1.1.**

**Proof of items *i* and *ii* of Lemma S1.1.** Simple calculations show that  $g(x) = xc_1(x)$  is a strictly increasing function of  $x$  for  $x > 0$ . Therefore, for each feature  $j \in \mathcal{R}_1$ ,  $e_j(x)/x$  is a strictly decreasing function of  $x$ . Despite the fact that  $e_j(x)/[x \cdot \text{rank}(e_j(x))]$  may not be monotone decreasing functions for  $j \in \mathcal{R}_1$ , it is guaranteed that

$f_i(x)/x = \min_{\{j: e_j(x) \geq e_i(x), j \in \mathcal{R}_1\}} e_j(x)/[x \cdot \text{rank}(e_j(x))]$  is a strictly decreasing function of  $x$  for each feature  $i \in \mathcal{R}_1$ . [The proof that  $f_i(x)/x$  is a strictly decreasing function is quite involved and is omitted for brevity.] Therefore, if a solution  $r_i \in (0, 1)$  to  $f_i(x)/x = 1$  exists, then it is unique, because for all  $x < r_i$ ,  $f_i(x)/x > 1$  and for all  $x > r_i$ ,  $f_i(x)/x < 1$ . When the function  $f_i(x)$  is computed with the modification in item *ii* of Theorem 1, the proof remains the same, because  $m^*$  does not depend on  $x$ .

**Proof of items *iii*–*v* of Lemma S1.1.** It is easy to see that for the procedure given in Variations, second paragraph, in the main text,  $\mathcal{R}_2 = \{i \in \mathcal{R}_1 : f_i(q) \leq q\}$ . The same result holds for the function  $f_i(x)$  with the modification of items *ii* and *iii* of Theorem 1 and the modified procedures in items *iv* and *v* of Lemma S1.1, respectively. Therefore, it is enough to prove that for  $i \in \mathcal{R}_1$ ,  $f_i(q) \leq q$  if and only if  $r_i \leq q$  for items *iii*–*v* of Lemma S1.1.

**Proof of item *iii*.** Assume  $f_i(q) \leq q$ . Note that  $f_i(x)$  can be defined on  $[0, 1)$  and  $f_i(0) > 0$  because the  $P$  values are positive. It can be shown that  $f_i(x)$  is a continuous function on  $[0, 1)$  and therefore  $h_i(x) = f_i(x) - x$  is a continuous function as well. [It is easy to see that  $f_i(x)$  is continuous at each  $x_0$  where  $e$  values are unique. Note that for each  $j \in \mathcal{R}_1$  the numerator of  $e_j(x)m/\text{rank}(e_j(x))$  is continuous and there is a small neighborhood of  $x_0$  where  $\text{rank}(e_j(x))$  does not change, yielding that  $e_j(x)m/\text{rank}(e_j(x))$  is continuous at  $x_0$ . Because the minimum of continuous functions is also continuous,  $f_i(x)$  is a continuous function as well. For  $x_0$  where  $e$  values are not unique, the proof is more involved. In these points the functions  $e_j(x)m/\text{rank}(e_j(x))$  may be not continuous; however,  $f_i(x)$  is continuous.] Using the facts that  $h_i(0) = f_i(0) - 0 > 0$  and  $h_i(q) = f_i(q) - q \leq 0$ , we obtain from the intermediate value theorem that a value  $0 < x_i \leq q$ , satisfying  $f_i(x_i) = x_i$ , exists. Using item *i*, we obtain that this solution is unique and  $r_i = x_i$ . Thus, we have proved  $r_i \leq q$ . Let us now assume that  $r_i \leq q$  and prove that  $f_i(q) \leq q$ . Because  $r_i \leq q$ ,  $r_i \neq 1$ , and therefore  $r_i$  is the unique solution in  $(0, 1)$  to  $f_i(x) = x$ . It follows from the fact that  $f_i(x)/x$  is monotone decreasing (see proof of item *i*) that  $f_i(q)/q \leq f_i(r_i)/r_i = 1$ , and therefore  $f_i(q) \leq q$ .

**Proof of item *iv*.** We need to prove that when we replace  $m$  with  $m^* = m \sum_{i=1}^m 1/i$  in the computation of  $f_i(x)$  and  $r_i$  for  $i \in \mathcal{R}_1$ ,  $r_i \leq q$  if and only if feature  $i$  is rejected by the procedure in Variations, where  $m$  is replaced by  $m = m^*$ . It is easy to see that for this modified procedure,  $\mathcal{R}_2 = \{i \in \mathcal{R}_1 : f_i(q) \leq q\}$ , where  $f_i(q)$  is computed with the modification above. It remains to prove that  $\{i \in \mathcal{R}_1 : f_i(q) \leq q\} = \{i \in \mathcal{R}_1 : r_i \leq q\}$ . Because  $f_i(x)$  is continuous, it is obvious that the modified function  $\tilde{f}_i(x)$  is continuous as well. Moreover,  $f_i(x)/x$  is monotone decreasing in  $x$ ; thus using arguments similar to the proof of item *iii*, the result follows.

**Proof of item *v*.** The proof that the function  $\tilde{c}_1(x)$  is well defined, i.e., that for all  $x \in (0, 1)$  a solution  $a$  to  $a \sum_{i=1}^{\lceil m/(ax) - 1 \rceil} 1/i = c_1(x)$  exists, is technical and therefore is omitted. Similarly to the items above, we need to prove that  $\{i \in \mathcal{R}_1 : \tilde{f}_i(q) \leq q\} = \{i \in \mathcal{R}_1 : \tilde{r}_i \leq q\}$ , where  $\tilde{f}_i(x)$  and  $\tilde{r}_i$  are the modified functions and  $r$  values, respectively, given in item *iii* of Theorem 1. We first show that if  $\tilde{f}_i(q) \leq q$ , then  $\tilde{r}_i = \min\{x : \tilde{f}_i(x) \leq x\} \in (0, 1)$  exists. It can be shown that  $\tilde{c}_1(x)$  is right continuous, and therefore  $\tilde{f}_i(x)$  is right continuous. [The proof that  $\tilde{c}_1(x)$  is right continuous is based on the facts that  $\lceil tm/(ax) - 1 \rceil$  is a right continuous function of  $x$  and  $c_1(x)$  is a continuous function. Since the proof is technical, it is omitted.] If  $\tilde{f}_i(q) \leq q$ , then  $\inf\{x : \tilde{f}_i(x) \leq x\} < 1$ . It remains to show that  $\inf\{x : \tilde{f}_i(x) \leq x\} \neq 0$ , because  $\tilde{f}_i(x)$  is right continuous for all  $x \in (0, 1)$ ; therefore if  $\inf\{x : \tilde{f}_i(x) \leq x\} \in (0, 1)$ , then  $\inf\{x : \tilde{f}_i(x) \leq x\} = \min\{x : \tilde{f}_i(x) \leq x\}$ . We now prove that  $\inf\{x : \tilde{f}_i(x) \leq x\} \neq 0$ . Note that  $\tilde{c}_1(x) \leq c_1(x)$  for all  $x \in (0, 1)$ , and therefore it can be shown that  $\tilde{f}_i(x) \geq f_i(x)$  for all  $x \in (0, 1)$ . As we noted in the proof of item *iii* of Lemma S1.1,  $f_i(x)$  can be defined for  $x \in [0, 1)$ , it is a continuous function on  $[0, 1)$ , and  $f_i(0) > 0$ . Therefore,  $\delta > 0$  exists such that  $f_i(x) > x$  for  $x \in [0, \delta)$ . It follows that  $\tilde{f}_i(x) > x$  for  $x \in (0, \delta)$ , and therefore



$\inf\{x : \tilde{f}_i(x) \leq x\} \neq 0$ . Thus, we have proved that if  $\tilde{f}_i(q) \leq q$ , then  $\tilde{r}_i = \min\{x : \tilde{f}_i(x) \leq x\} \in (0, 1)$  exists. From the definition of  $\tilde{r}_i$  we obtain  $\tilde{r}_i \leq q$ . Assume now that  $\tilde{r}_i \leq q$ ; i.e.,  $\min\{x : \tilde{f}_i(x) \leq x\} \leq q$ . It can be shown that  $\tilde{f}_i(x)/x$  is a monotone decreasing function, and therefore  $\tilde{f}_i(q)/q \leq \tilde{f}_i(\tilde{r}_i)/\tilde{r}_i \leq 1$ ; i.e.,  $\tilde{f}_i(q) \leq q$ . [The proof that  $\tilde{f}_i(x)/x$  is a monotone decreasing function is quite involved and is omitted for brevity. It is based on the facts that  $\tilde{c}_1(x)x$  is monotone increasing, and therefore  $e_j(x)/x$  is monotone decreasing for all  $j \in \mathcal{R}_1$ .]

## 52. GWAS Real Data Examples

Tables S1, S2, and S5 show the results of the replicability analysis for the SNPs followed up based on the results of the primary study (or studies). Columns 1–3 in Tables S1 and S2 and columns 1 and 2 in Table S5 contain the position of each SNP. Columns 4 and 5 in Tables S1 and S2 and columns 3 and 4 in Table S5 show the primary and follow-up  $P$  values. Columns 6–8 in Tables S1 and S2 and column 6 in Table S5 show the  $r$  values for different choices of  $l_{00}$ . Column 9 in Tables S1 and S2 and column 5 in Table S5 show the metaanalysis  $P$  values, which are the unadjusted  $P$  values computed using the data from the primary and follow-up studies for testing the global null hypothesis of no association in any of the studies. In Tables S1 and S2 the rows are sorted by the metaanalysis  $P$  values, and the handful of findings with most significant metaanalysis  $P$  values that were reported as interesting in the published works are marked with an asterisk in the last column.

## 53. Choice of Selection Rule for Replicability Analysis

Although any stable selection rule can be used, some selection rules may be more efficient than others. For a given FDR level  $q$ , the promising hypotheses for replicability analysis are the set of hypotheses rejected with the BH procedure at level  $c_1(q)q$  on the primary study  $P$  values. Therefore, for the purpose of replicability analysis, the set of hypotheses to be considered should be only this set or a subset thereof. This means that if  $R_1$  hypotheses are followed up, not all  $R_1$  features need to be selected for a replicability analysis at a predetermined level  $q$ . The advantage of selecting only the relevant subset is that the power of the procedure will be greater because the problem of multiplicity among the selected hypotheses will be smaller, without compromising any potential replicability claims. Specifically, for the  $r$  value to be below  $q$ , only the subset of  $R_1$  hypotheses selected for follow-up with primary study  $P$  values that are small enough needs to be considered, where our requirement for small enough is as follows: When applying the BH procedure at level  $c_1(q)q$  on  $p_{11}, \dots, p_{1m}$ , these hypotheses will be among the rejected. Computing the  $r$  values for the subset of  $\mathcal{R}_1$  with small enough primary study  $P$  values, we receive smaller  $r$  values than if all  $R_1$  SNPs are considered for replicability analysis.

For the example of GWAS of IgA nephropathy, for an FDR level of 0.05, only 14 SNPs of the 61 followed up had primary study  $P$  values small enough to be considered for replicability analysis. The number of  $r$  values below 0.05 was still seven with this modified selection rule, but these seven  $r$  values were smaller than the  $r$  values for the 7 SNPs in Table 1 of the main text. Specifically, with parameters  $(l_{00}, c_2) = (0.8, 0.5)$  for this superior selection rule that selected 14 SNPs for follow-up, the  $r$  values were 0.005, 0.008, 0.005, 0.008, 0.005, 0.041, and 0.017, whereas the  $r$  values computed using all 61 SNPs selected were, respectively, 0.007, 0.009, 0.006, 0.009, 0.009, 0.041, and 0.017.

## 54. Power Comparison for Different Values of $(l_{00}, c_2)$

We conducted simulations to investigate how the power and FDR of our proposal depend on  $c_2 \in (0, 1)$  and  $l_{00} \in \{0, 0.5, 0.8, 0.9\}$  for  $q = 0.05$ . The  $P$  values were generated independently as follows. Let  $P_{1j}$  and  $P_{2j}$  be the  $P$  values in the primary and in the follow-up study, respectively, for feature  $j$ . We set  $P_{1j} = 1 - \Phi(X_{1j})$

and  $P_{2j} = 1 - \Phi(X_{2j})$ , where  $X_{1j} \sim N(\mu_{1j}, 1)$ ,  $X_{2j} \sim N(\mu_{2j}, 1)$ . For  $i \in \{1, 2\}$ , we set  $\mu_{ij} = 0$  if feature  $j$  comes from a true null hypothesis in study  $i$  and  $\mu_{ij} = \mu_i > 0$  if feature  $j$  comes from a false null hypothesis in study  $i$ . The values of  $\mu_1$  and  $\mu_2$  were set according to the requirement that the power of the Bonferroni procedure at level 0.05 in the primary study is  $\pi_1$  and that in the follow-up study is  $\pi_2$ , for  $\pi_1 = 0.1$  and  $\pi_2 \in \{0.2, 0.5, 0.8\}$ . Specifically, we set  $\mu_1 = \Phi^{-1}(1 - 0.05/m) - \Phi^{-1}(1 - \pi_1)$  and  $\mu_2 = \Phi^{-1}(1 - 0.05/R_1) - \Phi^{-1}(1 - \pi_2)$ , where  $\Phi^{-1}$  is the inverse of the cumulative distribution function of a standard normal variable and  $R_1$  is the number of rejected hypotheses by the BH procedure at level  $c_1 \times 0.05$  applied on the primary study  $P$  values. In addition,  $m = 1,000$ ,  $f_{00} = 0.9$ ,  $f_{01} = f_{10} = 0.025$ , and  $f_{11} = 0.05$ .

The simulation results were based on 10,000 repetitions. The FDR was estimated by averaging the false discovery proportion. The average power was estimated by the average number of true replicability claims, divided by  $mf_{11}$ . We also estimated the probability that our proposal makes at least one true replicability claim (which we refer to as “power for at least one”) by the proportion of repetitions in which at least one true replicability claim was made. The SEs of the estimators were of the order of  $10^{-3}$  or  $10^{-4}$  for all of the sets of parameters.

A comparison of columns 8 and 9 with columns 3, 5, and 7 in Table S4 shows that the gain in power of using  $l_{00} > 0$  over  $l_{00} = 0$  can be large. Fig. S1 shows the average power and the power for at least one as a function of  $c_2 \in \{0.05, 0.1, \dots, 0.95\}$  for our proposal with  $l_{00} \in \{0, 0.5, 0.8, 0.9\}$  and  $q = 0.05$ . As expected, both measures of power increase as  $l_{00}$  increases. For fixed  $l_{00}$  and  $(\pi_1, \pi_2)$ , the highest average power among all of the choices of  $c_2$  is close to the average power when  $c_2 = 0.5$  (Fig. S1 *A, C, and E*), also shown in Table S4. The power curve for at least one as a function of  $c_2$  is flat around  $c_2 = 0.5$  (Fig. S1 *B, D, and F*), suggesting as well that  $c_2 = 0.5$  is an appropriate choice.

Fig. S2 shows the FDR as a function of  $c_2 \in \{0.05, 0.1, \dots, 0.95\}$ , for our proposal with  $l_{00} \in \{0, 0.5, 0.8, 0.9\}$  and  $q = 0.05$ . It can be seen that the FDR is far below 0.05 for all of the sets of parameters considered. This follows from the fact that our data generation may result in FDR much lower than the upper bound given in [S1]. To see this, note that it follows from the proof of *Theorem 1* that the FDR of our proposal achieves the upper bound in [S1] when the  $P$  values under the alternative are practically zero. In our simulation setting, this condition would hold if  $\mu_i$  for  $i \in \{1, 2\}$  were always extremely large compared with  $N(0, 1)$  random variables; e.g.,  $\mu_i \geq 4$ . Obviously this does not hold for our data generation process. Therefore, we could get higher FDR values for another data generation process; however, we still would not expect to achieve 0.05 because of using conservative upper bounds for  $f_{01}$  and  $E(|I_{10} \cap \mathcal{R}_1| / (\max|\mathcal{R}_1|, 1))$  in expression [S1].

## 55. GWAS Simulation Example

The goal of the simulation was threefold: first, to verify that the FDR is controlled below the nominal level for realistic simulations with GWAS-type dependency, even if hypotheses with primary study  $P$  values above  $c_1(q)q/m$  are followed up; second, to compare the performance of our suggested proposal with the BH procedure on maximum  $P$  values; and third, to examine the effect of  $l_{00}$  on the power of the two procedures.

The information on  $l_{00}$  is incorporated into the BH procedure on maximum  $P$  values, to make the comparison fair, by performing the BH procedure at level  $q/(1 - l_{00})$ . It is straightforward to show that the FDR is controlled at level at most  $q$  for the BH procedure on the maximum  $P$  values at level  $q/(1 - l_{00})$ , when the  $P$  values within each study are independent.

We simulated two GWAS from the simulator HAPGEN2 (2). The two studies were generated from two samples of the HapMap project (3), a sample of 165 Utah residents with Northern

and Western European ancestry (CEU) and a sample of 109 Chinese in Metropolitan Denver, Colorado (CHD). In the CEU and CHD populations, respectively, 34 and 38 SNPs were set as disease SNPs with an increased multiplicative relative risk of 1.2, and 18 of the disease SNPs were common to both populations. Each study contained 4,500 cases and 4,500 referents. The linkage disequilibrium (LD) across SNPs, as measured for the samples in the HapMap project, was retained. Due to LD, the number of SNPs associated with the phenotype in each study was larger than the number of disease SNPs. See ref. 1 for the details of this simulation.

The CHD study was the primary study, and the CEU study was the follow-up study. SNPs were selected for follow-up only if they were discovered by the BH procedure at level  $c_1(0.05) \times 0.05$ . Table S3 presents the average number of replicated findings, as well as the average false discovery proportion (FDP), for our proposal with  $c_2=0.5$  and  $q=0.05$ , and the BH procedure on maximum  $P$  values at level  $0.05/(1-l_{00})$ , for different values of  $l_{00}$ . From columns 4 and 7 it is clear that the FDR is controlled and that our proposal is actually conservative, for all values of  $l_{00}$ . From a comparison of columns 2 and 5 it is clear that our proposal is more powerful than the BH procedure on maximum  $P$  values. Finally, from comparisons of the rows it is clear that the power increases as  $l_{00}$  increases.

## S6. Procedure for FWER Control

**Theorem S6.1.** *A procedure that declares findings with Bonferroni  $r$  values at most  $\alpha$  as replicated controls the FWER for replicability analysis at level at most  $\alpha$  if  $l_{00} \leq f_{00}$  and the follow-up study  $P$  values are independent of the primary study  $P$  values.*

**Proof of Theorem S6.1.** It is easy to show that the procedure that declares findings with Bonferroni  $r$  values at most  $\alpha$  as replicated is equivalent to that of declaring as replicated all features with  $f_j^{\text{Bonf}}(\alpha) \leq \alpha$ . The equivalence follows from the facts that  $f_j^{\text{Bonf}}(x)$  is a continuous function of  $x$  and  $f_j^{\text{Bonf}}(x)/x$  is strictly monotone decreasing. We prove that the above procedure controls the FWER at a level that is smaller than or equal to

$$c_1 c_2 f_{00} \alpha^2 + f_{01} c_1 \alpha + c_2 \alpha E \left( \frac{|\mathcal{R}_1 \cap I_{10}|}{\max(|\mathcal{R}_1|, 1)} \right), \quad [\text{S20}]$$

where  $c_1 = (1 - c_2)/(1 - l_{00}(1 - c_2\alpha))$ . Note that this upper bound is equal to the upper bound given in expression [S1] with  $q = \alpha$ . We showed in the proof of *Theorem 1* that the expression in [S1] is at most  $q$  if  $l_{00} \leq f_{00}$ . Therefore, if the upper bound in [S20] holds and  $l_{00} \leq f_{00}$ , then *Theorem S6.1* follows.

We now prove that the expression in [S20] is an upper bound for the FWER for replicability analysis, which is  $\Pr(R_{00} + R_{10} + R_{01} > 0)$ . Note that

$$\Pr(R_{00} + R_{10} + R_{01} > 0) \leq E(R_{00} + R_{10} + R_{01}) = \sum_{x \in \{00, 01, 10\}} \sum_{j \in I_x} E(R_j).$$

For the procedure that declares as replicated all features with  $f_j^{\text{Bonf}}(\alpha) \leq \alpha$ , which is equivalent to the procedure that declares

findings with Bonferroni  $r$  values at most  $\alpha$  as replicated (as discussed above),

$$E(R_j) = \Pr \left( j \in \mathcal{R}_1, P_{1j} \leq \frac{c_1 \alpha}{m}, P_{2j} \leq \frac{c_2 \alpha}{\max(|\mathcal{R}_1|, 1)} \right). \quad [\text{S21}]$$

We give an upper bound for expression [S21] for  $j \in I_{01}$ ,  $j \in I_{10}$ , and  $j \in I_{00}$ . For  $j \in I_{01}$ ,

$$\Pr \left( j \in \mathcal{R}_1, P_{1j} \leq \frac{c_1 \alpha}{m}, P_{2j} \leq \frac{c_2 \alpha}{\max(|\mathcal{R}_1|, 1)} \right) \leq \Pr \left( P_{1j} \leq \frac{c_1 \alpha}{m} \right) \leq \frac{c_1 \alpha}{m}, \quad [\text{S22}]$$

where the last inequality follows from the fact that  $P_{1j}$  is a null-hypothesis  $P$  value.

For  $j \in I_{00} \cup I_{10}$  and an arbitrary fixed  $p_1 = (p_{11}, \dots, p_{1m})$  such that  $|\mathcal{R}_1(p_1)| > 0$ ,

$$\begin{aligned} E(R_j | P_1 = p_1) &= I \left( p_{1j} \leq \frac{c_1 \alpha}{m}, j \in \mathcal{R}_1(p_1) \right) \Pr \left( P_{2j} \leq \frac{c_2 \alpha}{|\mathcal{R}_1(p_1)|} \middle| P_1 = p_1 \right) \\ &\leq \frac{c_2 \alpha}{|\mathcal{R}_1(p_1)|} I \left( p_{1j} \leq \frac{c_1 \alpha}{m}, j \in \mathcal{R}_1(p_1) \right), \end{aligned} \quad [\text{S23}]$$

where inequality [S23] follows from the independence of the  $P$  values across the studies and the fact that  $P_{2j}$  is a null-hypothesis  $P$  value. Using [S23] we obtain the upper bounds on expression [S21] for  $j \in I_{10}$  and for  $j \in I_{00}$ . For  $j \in I_{10}$ , it follows that

$$E(R_j | P_1 = p_1) \leq \frac{c_2 \alpha}{|\mathcal{R}_1(p_1)|} I(j \in \mathcal{R}_1(p_1)),$$

and therefore

$$E(R_j) \leq c_2 \alpha E \left( \frac{I(j \in \mathcal{R}_1)}{\max(|\mathcal{R}_1|, 1)} \right). \quad [\text{S24}]$$

For  $j \in I_{00}$ , it follows that

$$\begin{aligned} E(R_j) &\leq c_2 \alpha E \left[ \frac{I(P_{1j} \leq c_1 \alpha / m, j \in \mathcal{R}_1(P_1))}{\max(|\mathcal{R}_1(P_1)|, 1)} \right] \\ &\leq c_2 \alpha E \left[ I \left( P_{1j} \leq \frac{c_1 \alpha}{m} \right) \right] \leq c_2 \alpha \frac{c_1 \alpha}{m}, \end{aligned} \quad [\text{S25}]$$

where the last inequality follows from the fact that  $P_{1j}$  is a null-hypothesis  $P$  value. From summing over the upper bounds [S22], [S24], and [S25] it thus follows that

$$\begin{aligned} \text{FWER} &\leq E(R_{00} + R_{10} + R_{01}) \leq c_1 c_2 f_{00} \alpha^2 + f_{01} c_1 \alpha \\ &\quad + c_2 \alpha E \left( \frac{|\mathcal{R}_1 \cap I_{10}|}{\max(|\mathcal{R}_1|, 1)} \right). \end{aligned}$$

1. Bogomolov M, Heller R (2013) Discovering findings that replicate from a primary study of high dimension to a follow-up study. *J Am Stat Assoc* 108(504):1480–1492.
2. Su Z, Marchini J, Donnelly P (2011) HAPGEN2: Simulation of multiple disease SNPs. *Bioinformatics* 27(16):2304–2305.

3. International HapMap Consortium (2003) The International HapMap Project. *Nature* 426(6968):789–796.



primary study is 1,000; and the signal-to-noise ratios for the primary study and the follow-up study, respectively, are taken according to the requirement that the power of the Bonferroni procedure at level 0.05 in the primary study is  $\pi_1$  and that in the follow-up study is  $\pi_2$  for  $(\pi_1, \pi_2) = (0.1, 0.2)$  (A and B),  $(\pi_1, \pi_2) = (0.1, 0.5)$  (C and D),  $(\pi_1, \pi_2) = (0.1, 0.8)$  (E and F).  $l_{00} = 0.9$  (solid curve),  $l_{00} = 0.8$  (dashed curve),  $l_{00} = 0.5$  (dashed-dotted curve), and  $l_{00} = 0$  (dotted curve). The SEs of the estimators were of the order of  $10^{-3}$  or  $10^{-4}$  for all of the sets of parameters.

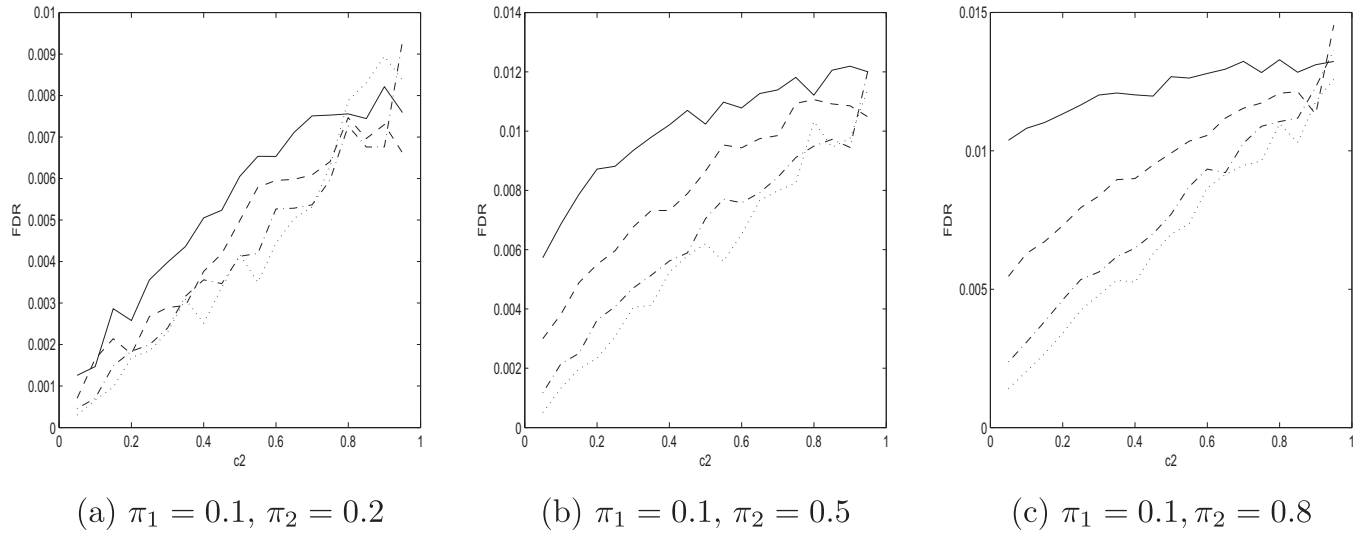

**Fig. S2.** The estimated FDR of our proposal with parameters  $(l_{00}, c_2, 0.05)$  as a function of  $c_2$  in a simulation where  $f_{00} = 0.9, f_{01} = f_{10} = 0.025, f_{11} = 0.05$ ; the number of hypotheses examined in the primary study is 1,000; and the signal-to-noise ratios for the primary study and the follow-up study,  $\mu_1/\sigma_1$  and  $\mu_2/\sigma_2$ , respectively, are taken according to the requirement that the power of the Bonferroni procedure at level 0.05 in the primary study is  $\pi_1$  and that in the follow-up study is  $\pi_2$  for  $(\pi_1, \pi_2) = (0.1, 0.2)$  (A),  $(\pi_1, \pi_2) = (0.1, 0.5)$  (B), and  $(\pi_1, \pi_2) = (0.1, 0.8)$  (C).  $l_{00} = 0.9$  (solid curve),  $l_{00} = 0.8$  (dashed curve),  $l_{00} = 0.5$  (dashed-dotted curve), and  $l_{00} = 0$  (dotted curve). The SEs were of the order of  $10^{-3}$  or  $10^{-4}$  for all of the sets of parameters.

**Table S1. Replicability analysis for the study of ref. 1**

| Chr. | Position    | Gene      | p1       | p2       | $l_{00} = 0$ | $l_{00} = 0.5$ | $l_{00} = 0.8$ | p_meta    |
|------|-------------|-----------|----------|----------|--------------|----------------|----------------|-----------|
| 6    | 32,685,358  | HLA-DRB1  | 8.19e-08 | 8.57e-14 | 0.0243       | 0.0150         | 0.0074         | 4.13e-20* |
| 8    | 6,810,195   | DEFAs     | 2.04e-07 | 1.25e-07 | 0.0409       | 0.0207         | 0.0090         | 3.18e-14* |
| 6    | 32,779,226  | HLA-DQA/B | 3.28e-08 | 3.57e-06 | 0.0224       | 0.0147         | 0.0059         | 3.43e-13* |
| 22   | 28,753,460  | MTMR3     | 2.30e-07 | 2.02e-05 | 0.0409       | 0.0207         | 0.0090         | 1.17e-11* |
| 6    | 30,049,922  | HLA-A     | 4.05e-09 | 3.68e-04 | 0.0224       | 0.0150         | 0.0090         | 1.74e-11* |
| 17   | 7,403,693   | TNFSF13   | 1.50e-06 | 2.52e-05 | 0.1907       | 0.1001         | 0.0413         | 9.40e-11* |
| 17   | 7,431,901   | MPDU1     | 5.52e-07 | 3.16e-04 | 0.0819       | 0.0418         | 0.0169         | 4.31e-10* |
| 2    | 111,315,937 | ACOXL     | 6.83e-05 | 3.41e-03 | 1            | 1              | 1              | 4.08e-07  |
| 16   | 31,255,249  | x         | 6.67e-05 | 7.41e-03 | 1            | 1              | 1              | 4.64e-06  |
| 4    | 78,121,177  | x         | 3.14e-10 | 8.16e-01 | 1            | 1              | 1              | 2.23e-05  |
| 11   | 113,369,319 | x         | 1.82e-09 | 9.74e-01 | 1            | 1              | 1              | 5.42e-05  |
| 7    | 33,386,800  | BBS9      | 2.75e-05 | 1.67e-01 | 1            | 1              | 1              | 1.17e-04  |
| 11   | 44,042,263  | x         | 1.74e-05 | 2.72e-01 | 1            | 1              | 1              | 1.24e-04  |
| 4    | 40,144,579  | x         | 9.95e-07 | 6.72e-01 | 1            | 1              | 1              | 1.85e-04  |
| 12   | 13,229,380  | x         | 1.23e-05 | 4.41e-01 | 1            | 1              | 1              | 3.09e-04  |
| 14   | 69,116,920  | x         | 4.60e-05 | 3.72e-01 | 1            | 1              | 1              | 3.71e-04  |
| 8    | 30,305,114  | x         | 3.19e-05 | 4.73e-01 | 1            | 1              | 1              | 5.38e-04  |
| 12   | 129,587,780 | x         | 4.59e-05 | 5.53e-01 | 1            | 1              | 1              | 6.84e-04  |
| 6    | 31,382,359  | x         | 8.20e-08 | 9.53e-01 | 1            | 1              | 1              | 7.64e-04  |
| 16   | 77,632,003  | WVOX      | 7.20e-05 | 4.57e-01 | 1            | 1              | 1              | 1.04e-03  |
| 8    | 97,393,458  | PTDSS1    | 5.67e-05 | 6.12e-01 | 1            | 1              | 1              | 1.09e-03  |
| 6    | 26,384,629  | x         | 4.32e-06 | 2.79e-01 | 1            | 1              | 1              | 1.25e-03  |
| 13   | 62,434,248  | x         | 3.77e-05 | 5.39e-01 | 1            | 1              | 1              | 1.70e-03  |
| 11   | 109,836,841 | FDX1      | 7.15e-05 | 7.19e-01 | 1            | 1              | 1              | 2.03e-03  |
| 18   | 35,923,102  | x         | 4.35e-05 | 2.85e-01 | 1            | 1              | 1              | 2.32e-03  |
| 6    | 13,733,392  | RANBP9    | 1.70e-05 | 8.45e-01 | 1            | 1              | 1              | 2.55e-03  |
| 9    | 78,162,069  | PSAT1     | 5.98e-05 | 8.01e-01 | 1            | 1              | 1              | 2.71e-03  |
| 10   | 55,006,847  | x         | 7.93e-05 | 6.87e-01 | 1            | 1              | 1              | 3.16e-03  |
| 6    | 33,163,516  | x         | 1.46e-04 | 7.74e-01 | 1            | 1              | 1              | 4.56e-03  |
| 7    | 158,006,056 | x         | 9.26e-05 | 7.50e-01 | 1            | 1              | 1              | 4.99e-03  |
| 6    | 106,231,017 | x         | 6.19e-05 | 8.59e-01 | 1            | 1              | 1              | 6.41e-03  |
| 21   | 19,339,830  | x         | 7.81e-05 | 5.34e-01 | 1            | 1              | 1              | 6.58e-03  |
| 12   | 19,488,937  | AEBP2     | 4.95e-05 | 4.77e-01 | 1            | 1              | 1              | 6.92e-03  |
| 18   | 57,221,085  | x         | 8.62e-06 | 5.48e-01 | 1            | 1              | 1              | 7.96e-03  |
| 10   | 76,538,473  | DUSP13    | 7.84e-05 | 8.54e-01 | 1            | 1              | 1              | 9.18e-03  |
| 8    | 1,307,131   | x         | 4.95e-05 | 7.52e-01 | 1            | 1              | 1              | 1.14e-02  |
| 16   | 72,315,398  | x         | 4.92e-05 | 9.92e-01 | 1            | 1              | 1              | 1.24e-02  |
| 3    | 130,747,968 | H1FOO     | 1.85e-05 | 8.90e-01 | 1            | 1              | 1              | 1.65e-02  |
| 12   | 39,245,441  | x         | 1.21e-07 | 4.38e-01 | 1            | 1              | 1              | 1.66e-02  |
| 7    | 92,588,411  | CCDC132   | 1.28e-07 | 4.09e-01 | 1            | 1              | 1              | 1.77e-02  |
| 1    | 110,389,963 | x         | 1.46e-07 | 2.59e-01 | 1            | 1              | 1              | 1.99e-02  |
| 9    | 21,342,862  | x         | 7.95e-05 | 9.45e-01 | 1            | 1              | 1              | 2.18e-02  |
| 2    | 46,170,592  | PRKCE     | 1.78e-05 | 3.40e-01 | 1            | 1              | 1              | 2.21e-02  |
| 17   | 52,636,364  | x         | 3.45e-05 | 5.20e-01 | 1            | 1              | 1              | 2.26e-02  |
| 1    | 82,547,439  | x         | 5.51e-05 | 8.89e-01 | 1            | 1              | 1              | 2.72e-02  |
| 6    | 156,238,397 | x         | 4.73e-05 | 1.43e-01 | 1            | 1              | 1              | 2.80e-02  |
| 11   | 61,956,393  | x         | 2.16e-06 | 5.37e-01 | 1            | 1              | 1              | 4.10e-02  |
| 10   | 135,319,919 | x         | 3.90e-05 | 6.76e-01 | 1            | 1              | 1              | 4.33e-02  |
| 12   | 66,026,196  | x         | 2.57e-06 | 5.08e-01 | 1            | 1              | 1              | 4.42e-02  |
| 8    | 25,535,212  | x         | 2.46e-05 | 3.44e-01 | 1            | 1              | 1              | 5.31e-02  |
| 15   | 88,817,746  | IQGAP1    | 8.64e-05 | 2.22e-01 | 1            | 1              | 1              | 5.76e-02  |
| 6    | 13,707,282  | SIRT5     | 3.98e-05 | 3.66e-01 | 1            | 1              | 1              | 6.84e-02  |
| 1    | 70,907,559  | x         | 3.96e-05 | 4.71e-01 | 1            | 1              | 1              | 7.24e-02  |
| 1    | 176,696,794 | CEP350    | 7.14e-05 | 4.50e-01 | 1            | 1              | 1              | 1.04e-01  |
| 12   | 8,955,888   | x         | 7.85e-06 | 2.07e-01 | 1            | 1              | 1              | 1.10e-01  |
| 11   | 94,090,071  | x         | 5.22e-05 | 3.08e-01 | 1            | 1              | 1              | 1.29e-01  |
| 2    | 4,641,380   | x         | 9.57e-05 | 3.68e-01 | 1            | 1              | 1              | 1.39e-01  |
| 1    | 23,749,819  | x         | 8.10e-05 | 2.08e-01 | 1            | 1              | 1              | 1.58e-01  |
| 7    | 105,466,371 | x         | 4.61e-05 | 9.90e-02 | 1            | 1              | 1              | 2.32e-01  |
| 5    | 4,489,013   | x         | 8.96e-05 | 3.83e-02 | 1            | 1              | 1              | 4.40e-01  |
| 1    | 215,993,345 | x         | 2.67e-05 | 1.32e-02 | 1            | 1              | 1              | 4.90e-01  |

Chr., chromosome.

1. Yu XQ, et al. (2012) A genome-wide association study in Han Chinese identifies multiple susceptibility loci for IgA nephropathy. *Nat Genet* 44(2):178-182.



**Table S2. Replicability analysis for the study of ref. 1, with 635,547 SNPs in the primary study and with 126 SNPs followed up**

| Row no. | Chr. | Position    | p1       | p2       | $I_{00}=0$ | $I_{00}=0.5$ | $I_{00}=0.8$ | p_meta    |
|---------|------|-------------|----------|----------|------------|--------------|--------------|-----------|
| 1       | 1    | 67,417,979  | 3.19e-34 | 1.50e-36 | 4.05e-28   | 2.03e-28     | 8.11e-29     | 2.15e-68  |
| 2       | 1    | 67,414,547  | 5.05e-36 | 3.10e-29 | 3.91e-27   | 3.91e-27     | 3.91e-27     | 3.33e-63* |
| 3       | 1    | 67,387,537  | 1.35e-24 | 5.62e-17 | 4.72e-15   | 4.72e-15     | 4.72e-15     | 1.82e-39  |
| 4       | 2    | 233,962,410 | 5.66e-21 | 7.67e-14 | 4.83e-12   | 4.83e-12     | 4.83e-12     | 1.18e-32* |
| 5       | 5    | 40,428,485  | 2.51e-22 | 2.79e-08 | 1.34e-06   | 1.14e-06     | 1.14e-06     | 3.09e-27* |
| 6       | 5    | 40,437,266  | 2.26e-22 | 3.18e-08 | 1.34e-06   | 1.14e-06     | 1.14e-06     | 3.41e-27  |
| 7       | 2    | 233,965,368 | 1.28e-21 | 3.66e-05 | 5.76e-04   | 5.76e-04     | 5.76e-04     | 4.61e-25  |
| 8       | 10   | 64,108,492  | 9.51e-12 | 1.61e-10 | 1.73e-06   | 1.14e-06     | 4.84e-07     | 2.23e-20* |
| 9       | 5    | 131,798,704 | 2.29e-09 | 3.52e-11 | 2.08e-04   | 1.04e-04     | 4.16e-05     | 1.16e-18* |
| 10      | 18   | 12,769,947  | 5.95e-12 | 2.41e-07 | 7.20e-06   | 6.48e-06     | 6.48e-06     | 2.55e-17* |
| 11      | 10   | 101,281,583 | 8.53e-11 | 1.69e-07 | 1.05e-05   | 6.48e-06     | 5.32e-06     | 1.53e-16* |
| 12      | 5    | 150,239,060 | 3.18e-11 | 2.57e-07 | 7.20e-06   | 6.48e-06     | 6.48e-06     | 1.70e-16* |
| 13      | 10   | 101,282,445 | 9.09e-11 | 3.10e-07 | 1.05e-05   | 7.10e-06     | 7.10e-06     | 3.05e-16  |
| 14      | 18   | 12,799,340  | 3.27e-11 | 1.23e-06 | 2.38e-05   | 2.38e-05     | 2.38e-05     | 7.05e-16  |
| 15      | 5    | 150,203,580 | 4.09e-11 | 7.47e-07 | 1.57e-05   | 1.57e-05     | 1.57e-05     | 7.33e-16  |
| 16      | 13   | 43,355,925  | 8.04e-08 | 1.33e-07 | 5.68e-03   | 2.84e-03     | 1.21e-03     | 1.04e-13* |
| 17      | 5    | 158,747,111 | 4.40e-09 | 3.66e-06 | 3.73e-04   | 1.86e-04     | 7.46e-05     | 1.93e-13* |
| 18      | 6    | 167,408,399 | 1.65e-07 | 3.26e-07 | 8.74e-03   | 4.57e-03     | 1.91e-03     | 5.22e-13* |
| 19      | 3    | 49,696,536  | 1.08e-07 | 5.64e-07 | 6.54e-03   | 3.27e-03     | 1.38e-03     | 5.76e-13* |
| 20      | 17   | 37,767,727  | 2.97e-06 | 9.15e-08 | 8.58e-02   | 4.60e-02     | 2.07e-02     | 3.41e-12* |
| 21      | 3    | 49,676,987  | 9.47e-08 | 2.24e-06 | 6.02e-03   | 3.01e-03     | 1.27e-03     | 3.55e-12  |
| 22      | 1    | 197,667,523 | 3.41e-07 | 2.34e-06 | 1.44e-02   | 7.50e-03     | 3.36e-03     | 7.17e-12* |
| 23      | 12   | 39,104,262  | 8.95e-08 | 6.55e-05 | 5.99e-03   | 3.00e-03     | 1.27e-03     | 6.36e-11  |
| 24      | 6    | 106,541,962 | 1.85e-06 | 7.70e-06 | 6.03e-02   | 3.23e-02     | 1.42e-02     | 1.22e-10* |
| 25      | 9    | 114,645,994 | 1.96e-07 | 6.58e-05 | 9.46e-03   | 4.93e-03     | 2.18e-03     | 1.30e-10* |
| 26      | 12   | 38,888,207  | 6.64e-08 | 1.65e-04 | 4.96e-03   | 2.49e-03     | 1.91e-03     | 1.54e-10* |
| 27      | 6    | 20,836,710  | 1.26e-07 | 2.78e-04 | 7.28e-03   | 3.65e-03     | 2.92e-03     | 4.48e-10* |
| 28      | 11   | 75,978,964  | 7.16e-08 | 7.32e-04 | 8.02e-03   | 6.83e-03     | 6.36e-03     | 6.60e-10* |
| 29      | 21   | 44,439,989  | 5.41e-06 | 1.59e-05 | 1.32e-01   | 7.27e-02     | 3.18e-02     | 7.04e-10* |
| 30      | 1    | 157,665,119 | 1.75e-07 | 4.81e-04 | 8.90e-03   | 4.93e-03     | 4.33e-03     | 7.30e-10* |
| 31      | 1    | 169,593,891 | 2.01e-07 | 3.21e-04 | 9.46e-03   | 4.93e-03     | 3.24e-03     | 7.66e-10* |
| 32      | 1    | 197,691,964 | 9.69e-07 | 1.00e-04 | 3.52e-02   | 1.94e-02     | 8.07e-03     | 8.10e-10  |
| 33      | 10   | 35,327,656  | 4.24e-06 | 2.53e-05 | 1.10e-01   | 6.03e-02     | 2.64e-02     | 8.93e-10* |
| 34      | 19   | 1,074,378   | 5.80e-09 | 3.47e-03 | 2.82e-02   | 2.57e-02     | 2.19e-02     | 1.06e-09  |
| 35      | 19   | 1,075,031   | 6.48e-09 | 2.10e-02 | 1.10e-01   | 9.80e-02     | 8.97e-02     | 1.18e-09  |
| 36      | 20   | 61,798,026  | 7.60e-07 | 1.38e-04 | 2.93e-02   | 1.57e-02     | 6.52e-03     | 1.30e-09  |
| 37      | 7    | 50,081,722  | 1.58e-05 | 9.41e-06 | 2.73e-01   | 1.67e-01     | 8.20e-02     | 1.39e-09  |
| 38      | 6    | 167,405,736 | 1.65e-07 | 1.21e-03 | 1.09e-02   | 1.02e-02     | 9.24e-03     | 1.58e-09  |
| 39      | 9    | 4,971,602   | 3.40e-07 | 4.30e-04 | 1.44e-02   | 7.50e-03     | 4.01e-03     | 1.73e-09* |
| 40      | 6    | 32,789,255  | 1.53e-08 | 3.82e-03 | 2.93e-02   | 2.75e-02     | 2.35e-02     | 2.17e-09  |
| 41      | 8    | 126,609,233 | 2.45e-06 | 1.09e-04 | 7.41e-02   | 3.87e-02     | 1.74e-02     | 2.25e-09* |
| 42      | 7    | 50,046,933  | 2.46e-05 | 1.10e-05 | 3.68e-01   | 2.36e-01     | 1.24e-01     | 2.30e-09* |
| 43      | 17   | 35,294,289  | 1.06e-06 | 2.92e-04 | 3.74e-02   | 2.06e-02     | 8.57e-03     | 2.50e-09* |
| 44      | 6    | 32,484,449  | 7.23e-09 | 6.02e-03 | 4.10e-02   | 3.79e-02     | 3.23e-02     | 2.60e-09  |
| 45      | 8    | 126,603,853 | 1.90e-06 | 1.82e-04 | 6.04e-02   | 3.23e-02     | 1.42e-02     | 2.78e-09  |
| 46      | 9    | 114,648,320 | 1.31e-07 | 4.22e-03 | 3.13e-02   | 2.95e-02     | 2.53e-02     | 3.67e-09  |
| 47      | 21   | 15,727,091  | 1.03e-05 | 4.58e-05 | 2.02e-01   | 1.16e-01     | 5.37e-02     | 3.70e-09* |
| 48      | 1    | 114,015,850 | 7.75e-06 | 8.25e-05 | 1.67e-01   | 9.75e-02     | 4.28e-02     | 4.95e-09  |
| 49      | 1    | 114,089,610 | 9.05e-06 | 1.01e-04 | 1.89e-01   | 1.10e-01     | 4.85e-02     | 7.30e-09* |
| 50      | 10   | 35,589,263  | 6.05e-06 | 1.76e-04 | 1.40e-01   | 8.00e-02     | 3.42e-02     | 8.04e-09  |
| 51      | 21   | 44,436,378  | 5.21e-06 | 3.61e-04 | 1.30e-01   | 7.14e-02     | 3.16e-02     | 1.43e-08  |
| 52      | 21   | 15,734,423  | 1.00e-05 | 4.44e-04 | 2.02e-01   | 1.16e-01     | 5.31e-02     | 3.36e-08  |
| 53      | 3    | 49,499,240  | 2.42e-08 | 1.94e-01 | 5.28e-01   | 5.28e-01     | 5.28e-01     | 3.56e-08  |
| 54      | 9    | 4,978,761   | 1.96e-06 | 1.62e-03 | 6.08e-02   | 3.25e-02     | 1.42e-02     | 4.34e-08  |
| 55      | 2    | 61,129,193  | 3.07e-06 | 2.80e-03 | 8.67e-02   | 4.64e-02     | 2.08e-02     | 6.36e-08  |
| 56      | 1    | 169,594,596 | 1.90e-07 | 2.60e-02 | 1.30e-01   | 1.16e-01     | 1.09e-01     | 9.01e-08  |
| 57      | 3    | 49,425,868  | 2.84e-08 | 1.07e-01 | 3.28e-01   | 3.16e-01     | 3.16e-01     | 1.20e-07  |
| 58      | 13   | 43,497,789  | 6.90e-07 | 8.82e-03 | 5.85e-02   | 5.05e-02     | 4.36e-02     | 1.44e-07  |
| 59      | 2    | 61,098,480  | 3.82e-06 | 5.65e-03 | 1.03e-01   | 5.54e-02     | 3.16e-02     | 1.57e-07  |
| 60      | 6    | 20,797,924  | 1.83e-07 | 2.88e-02 | 1.34e-01   | 1.19e-01     | 1.17e-01     | 1.64e-07  |



**Table S2. Cont.**

| Row no. | Chr. | Position    | p1       | p2       | $l_{00}=0$ | $l_{00}=0.5$ | $l_{00}=0.8$ | p_meta   |
|---------|------|-------------|----------|----------|------------|--------------|--------------|----------|
| 123     | 18   | 54,054,701  | 9.40e-06 | 1.95e-01 | 5.28e-01   | 5.28e-01     | 5.28e-01     | 5.28e-03 |
| 124     | 18   | 75,865,061  | 2.11e-06 | 1.08e-01 | 3.28e-01   | 3.16e-01     | 3.16e-01     | 6.92e-03 |
| 125     | 15   | 72,685,472  | 5.81e-06 | 7.71e-02 | 2.70e-01   | 2.59e-01     | 2.52e-01     | 1.27e-02 |
| 126     | 8    | 107,743,073 | 2.59e-05 | 1.43e-01 | 4.19e-01   | 4.09e-01     | 4.09e-01     | 1.36e-02 |

The last column marks the 30 SNPs that were highlighted as "convincingly (Bonferroni  $P < 0.05$ ) replicated CD risk loci," based on the follow-up study  $P$  values, in table 2 of the main text of ref. 1.

1. Barrett JC, et al.; NIDDK IBD Genetics Consortium; Belgian-French IBD Consortium; Wellcome Trust Case Control Consortium (2008) Genome-wide association defines more than 30 distinct susceptibility loci for Crohn's disease. *Nat Genet* 40(8):955–962.

**Table S3. For 4,500 cases and 4,500 referents in both studies, the average number of associated and disease SNPs discovered (SE) and the average FDP (SE), for different values of  $l_{00}$** 

| $l_{00}$ | FDR $r$ values $\leq 0.05$ |                   |               | BH procedure on maximum $P$ values at level $0.05/(1-l_{00})$ |                   |               |
|----------|----------------------------|-------------------|---------------|---------------------------------------------------------------|-------------------|---------------|
|          | No. replicated findings    |                   |               | No. replicated findings                                       |                   |               |
|          | Associated SNPs (SE)       | Disease SNPs (SE) | FDP (SE)      | Associated SNPs (SE)                                          | Disease SNPs (SE) | FDP (SE)      |
| 0        | 41.5 (5.3)                 | 8.3 (0.5)         | 0.011 (0.011) | 29.2 (3.2)                                                    | 7.4 (0.4)         | 0.000 (0.000) |
| 0.8      | 55.4 (5.3)                 | 9.3 (0.4)         | 0.013 (0.013) | 39.0 (3.5)                                                    | 8.5 (0.5)         | 0.000 (0.000) |
| 0.9      | 58.4 (4.9)                 | 9.6 (0.3)         | 0.014 (0.014) | 42.8 (3.3)                                                    | 9.1 (0.4)         | 0.000 (0.000) |
| 0.95     | 59.9 (4.5)                 | 9.7 (0.3)         | 0.015 (0.014) | 46.1 (3.5)                                                    | 9.3 (0.3)         | 0.000 (0.000) |
| 0.99     | 60.0 (4.6)                 | 9.7 (0.3)         | 0.015 (0.014) | 50.8 (3.9)                                                    | 9.4 (0.3)         | 0.000 (0.000) |

The actual value of  $f_{00}$  was above 0.999. Results are given for our proposal with  $c_2 = 0.05$  and  $q = 0.05$  in columns 2–4 and for the BH procedure on maximum  $P$  values at level  $0.05/(1-l_{00})$  in columns 5–7. SNPs were selected for follow-up only if they were discovered by the BH procedure at level  $c_1(0.05) \times 0.05$ .

**Table S4. The estimated average power of our proposal with parameters  $(l_{00}, c_2, 0.05)$ , where  $c_2$  is the optimal choice among the values in  $\{0.05, 0.1, \dots, 0.95\}$  for  $l_{00} = 0.5$  (column 2),  $l_{00} = 0.8$  (column 4),  $l_{00} = 0.9$  (column 6), and  $l_{00} = 0$  (column 8), and the optimal value of  $c_2$  is given in the row below;  $c_2 = 0.5$ , for  $l_{00} \in \{0.5, 0.8, 0.9, 0\}$  (columns 3, 5, 7, 9) in a configuration  $f_{00} = 0.9$ ,  $f_{01} = f_{10} = 0.025$ ,  $f_{11} = 0.05$** 

| $(\pi_1, \pi_2)$ | Optimal for $l_{00} = 0.5$ | $l_{00} = 0.5$ , $c_2 = 0.5$ | Optimal for $l_{00} = 0.8$ | $l_{00} = 0.8$ , $c_2 = 0.5$ | Optimal for $l_{00} = 0.9$ | $l_{00} = 0.9$ , $c_2 = 0.5$ | Optimal for $l_{00} = 0$ | $l_{00} = 0$ , $c_2 = 0.5$ |
|------------------|----------------------------|------------------------------|----------------------------|------------------------------|----------------------------|------------------------------|--------------------------|----------------------------|
| (0.1, 0.8)       | 0.2980                     | 0.2515                       | 0.4486                     | 0.3858                       | 0.5681                     | 0.4921                       | 0.2009                   | 0.1686                     |
|                  | $c_2 = 0.2$                |                              | $c_2 = 0.2$                |                              | $c_2 = 0.15$               |                              | $c_2 = 0.2$              |                            |
| (0.1, 0.5)       | 0.1749                     | 0.1666                       | 0.2881                     | 0.2750                       | 0.3837                     | 0.3669                       | 0.1105                   | 0.1044                     |
|                  | $c_2 = 0.35$               |                              | $c_2 = 0.35$               |                              | $c_2 = 0.35$               |                              | $c_2 = 0.35$             |                            |
| (0.1, 0.2)       | 0.0425                     | 0.0425                       | 0.0786                     | 0.0781                       | 0.1152                     | 0.1152                       | 0.0261                   | 0.0258                     |
|                  | $c_2 = 0.5$                |                              | $c_2 = 0.55$               |                              | $c_2 = 0.5$                |                              | $c_2 = 0.55$             |                            |

The number of hypotheses examined in the primary study is 1,000. The signal-to-noise ratios for the primary study and the follow-up study,  $\mu_1/\sigma_1$  and  $\mu_2/\sigma_2$ , respectively, are taken according to the requirement that the power of the Bonferroni procedure at level 0.05 in the primary study is  $\pi_1$  and that in the follow-up study is  $\pi_2$  (given in the first column). The SEs were of the order of  $10^{-3}$  or  $10^{-4}$  for all of the estimates.

**Table S5. Replicability analysis for FWER control for the study of ref. 1 on GWAS of TPP**

| Chr. | Position   | p1       | p2       | p_meta   | $r$ value |
|------|------------|----------|----------|----------|-----------|
| 17   | 65,837,933 | 6.28e-10 | 1.49e-05 | 7.69e-14 | 0.00012   |
| 17   | 65,818,432 | 1.39e-09 | 7.36e-05 | 1.59e-12 | 0.00059   |
| 17   | 65,799,923 | 2.27e-09 | 7.25e-05 | 1.09e-12 | 0.00058   |
| 17   | 65,778,654 | 1.84e-08 | 0.000116 | 1.6e-11  | 0.00360   |

The number of SNPs in the primary study was 486,782, and 4 SNPs were followed up. The lower bound for  $f_{00}$  was  $l_{00} = 0.8$  for the  $r$ -value computation.

1. Cheung CL, et al. (2012) Genome-wide association study identifies a susceptibility locus for thyrotoxic periodic paralysis at 17q24.3. *Nat Genet* 44(9):1026–1029.
